# Supplementary material
Source: PubMed Central journal article supplement (PMC6601106)
Supplement: 2019_219832-Disclosure.pdf [file 2019_219832-Disclosure.pdf]

Haematologica  
HAEMATOL/2019/219832  
Version 1

Hyperactive GPIb-VWF interaction as cause of thrombocytopenia:  
altered platelet formation versus clearance

Kathleen Freson

Disclosures: no conflicts
